# Supplementary material
Source: publisher site journal article supplement (https://www.spandidos-publications.com/4049/downloadSupplementary)

Figure S1. Knockdown of ZAPL and ZAPS protein expression by siRNA in RT7 cells. ZAPL and ZAPS expression in RT7 cells was examined via western blotting, and the results are the semi-quantification of those presented in Fig. 4B. Protein expression was evaluated by comparing the integrated density of the bands, then the relative ratio of ZAPL and ZAPS proteins in comparison with total GAPDH protein was determined. Statistical analysis was performed using an unpaired t-test. \* $P < 0.05$ . ZAPL, long form of zinc-finger antiviral protein; ZAPS, short form of zinc-finger antiviral protein; Si/siRNA, small interfering RNA.

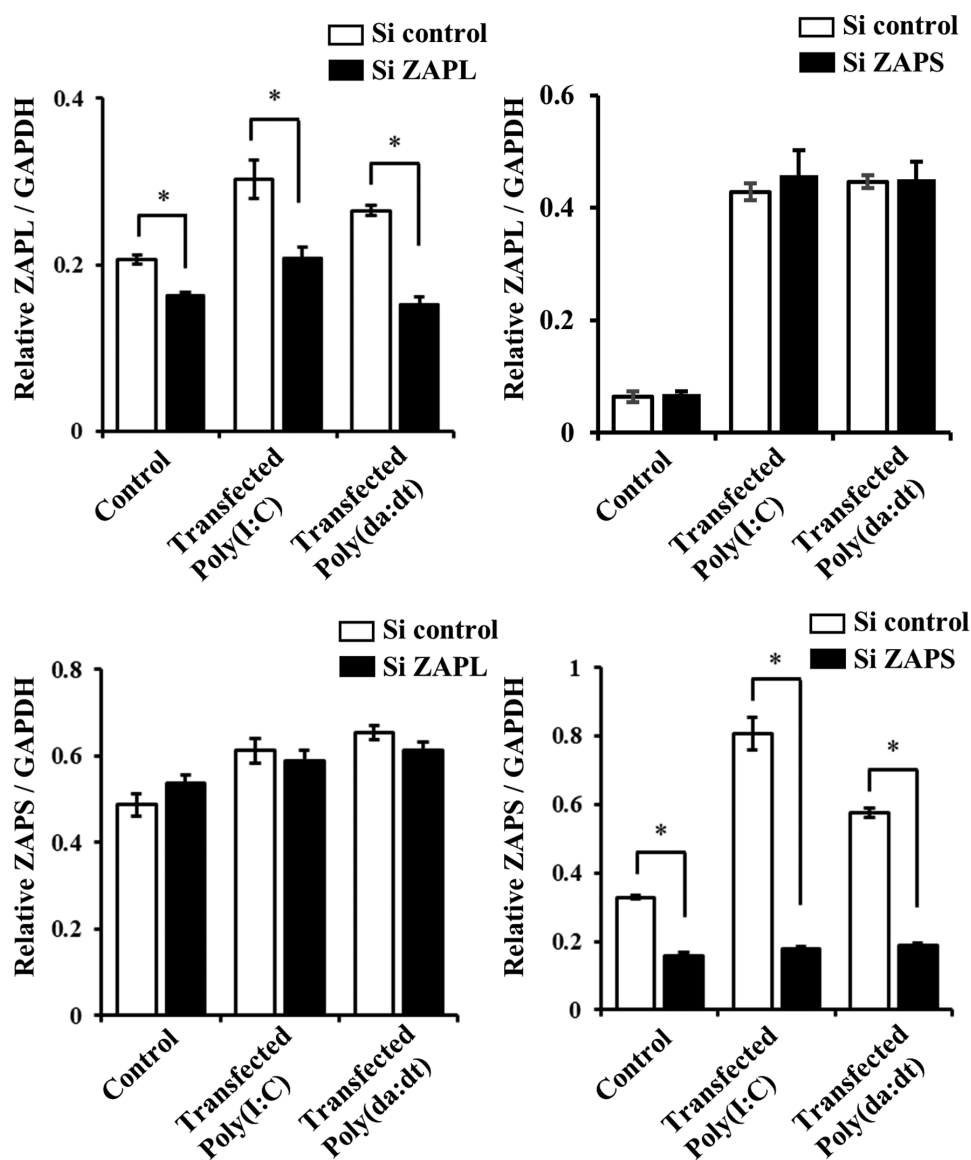

Figure S2. Knockdown of ZAPL and ZAPS protein expression by siRNA in GT1 cells. ZAPL and ZAPS expression in GT1 cells was examined via western blotting, and the results are the semi-quantification of those presented in Fig. 4B. Protein expression was evaluated by comparing the integrated density of the bands, then the relative ratio of ZAPL and ZAPS proteins in comparison with total GAPDH protein was determined. Statistical analysis was performed using an unpaired t-test. \*P<0.05. ZAPL, long form of zinc-finger antiviral protein; ZAPS, short form of zinc-finger antiviral protein; Si/siRNA, small interfering RNA.

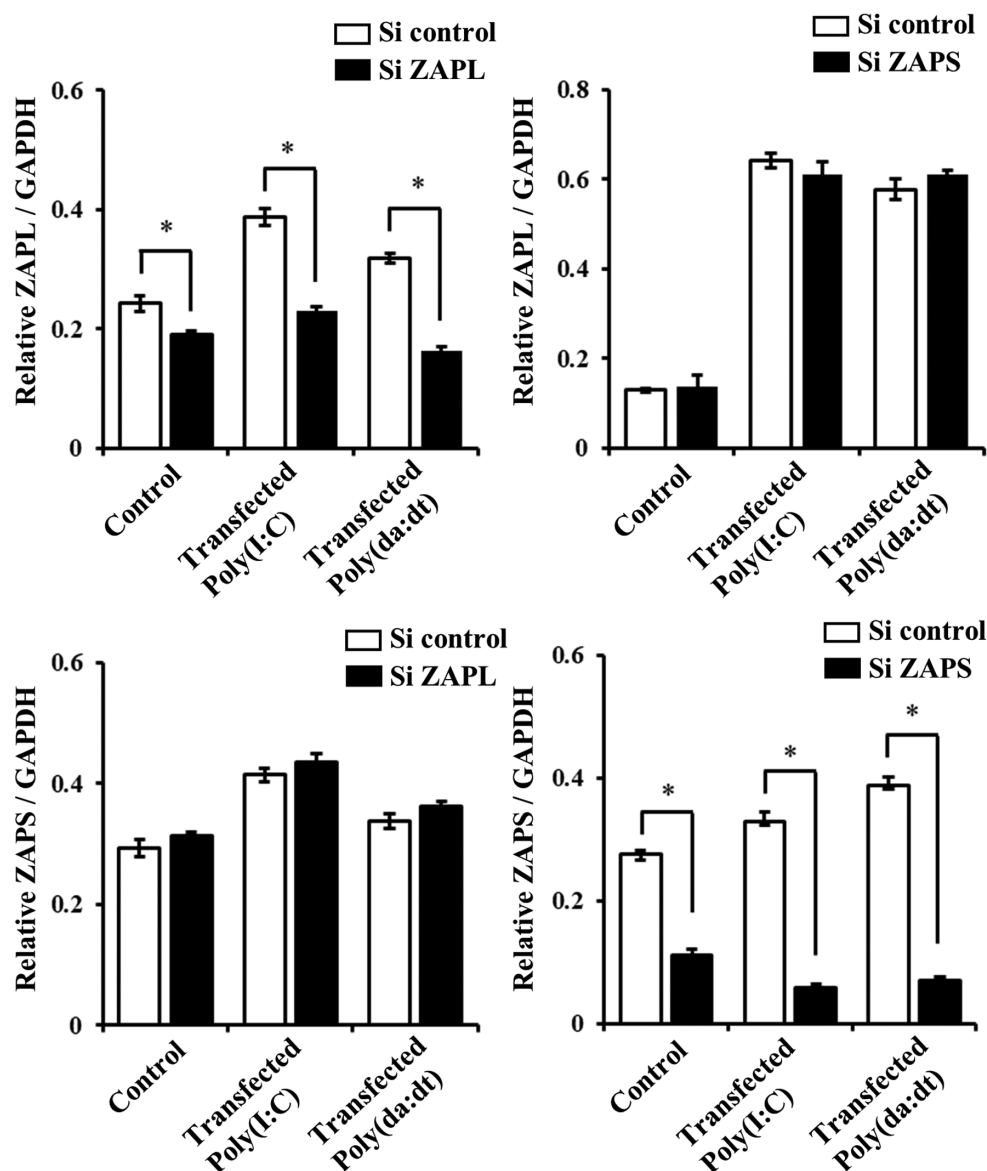

Supplement: Supplementary file 1 [file downloadSupplementary]
